# Supplementary material for: p18 inhibits reprogramming through inactivation of Cdk4/6
Source: PubMed Central journal article supplement (PMC4971472; doi:10.1038/srep31085), 2016-08-03
Supplement: srep31085-s1.pdf [file srep31085-s1.pdf]

## p18 inhibits reprogramming through inactivation of Cdk4/6

Shaohua Zhu<sup>1,2</sup>, Jiani Cao<sup>2</sup>, Hongyan Sun<sup>2,3</sup>, Kun Liu<sup>2,3</sup>, Yaqiong Li<sup>2,3</sup>, Tongbiao Zhao<sup>1,2,3\*</sup>

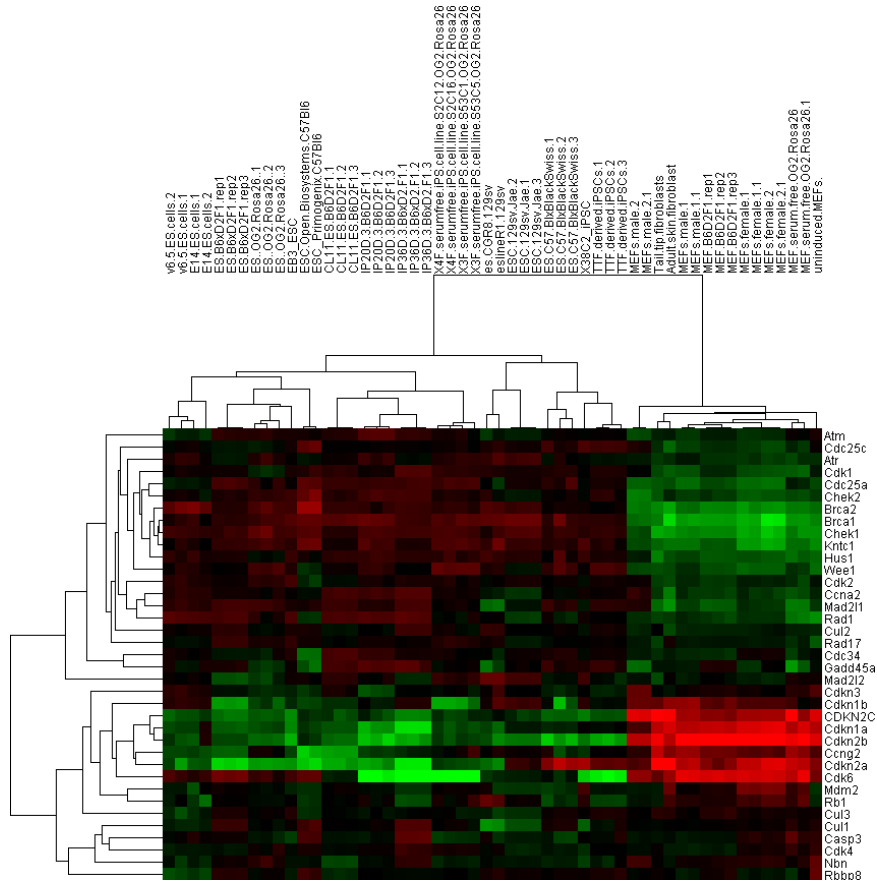

**Supplementary Figure 1 Heat map of expression levels of the cell cycle related genes.** 37 cell cycle relevant gene expressions were analyzed for their differential expression in mouse ESC, iPSC and somatic fibroblasts. The gene expression data were downloaded from NCBI. The GEO numbers of each cell line were listed in Supplementary table 2. R-Bioconductor was used for data quantile normalization and subsequent data processing. Genes, with p-value  $\leq 0.05$ , false discovery rate (FDR)  $\leq 0.05$  and fold-change  $\geq 2$  (multiple hypothesis testing method, using the standard number of 1000 permutations), were considered as differentially expressed. Unsupervised hierarchical clustering of the expression profile was performed using Claster3.0 Software.

## p18 inhibits reprogramming through inactivation of Cdk4/6

Shaohua Zhu<sup>1,2</sup>, Jiani Cao<sup>2</sup>, Hongyan Sun<sup>2,3</sup>, Kun Liu<sup>2,3</sup>, Yaqiong Li<sup>2,3</sup>, Tongbiao Zhao<sup>1,2,3\*</sup>

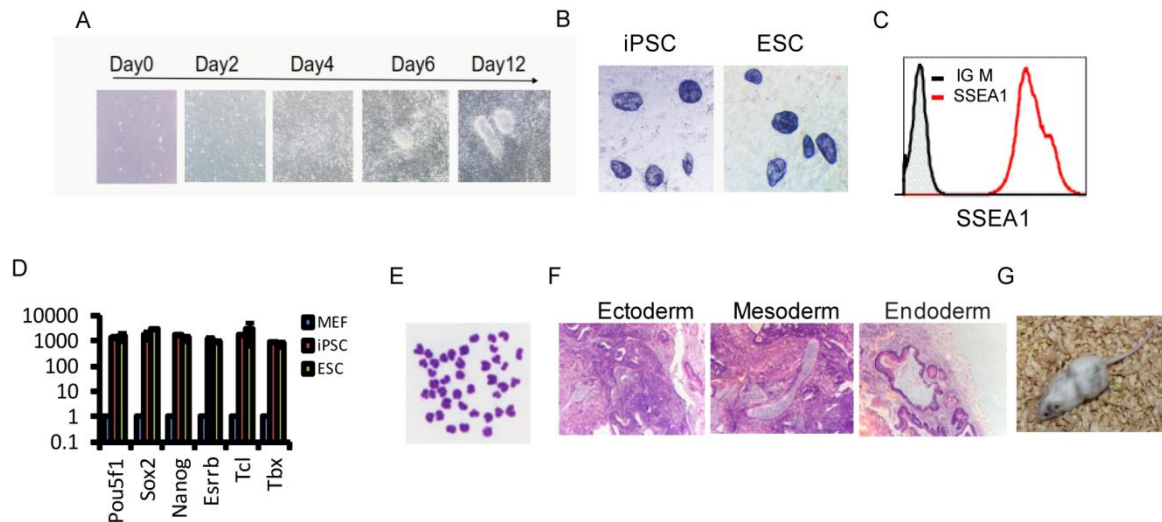

**Supplementary Figure 2 The established iPSCs are pluripotent.** **A**, Morphology of MEFs on days 0, 2, 4, 6 and 12 of reprogramming. **B**, Alkaline phosphatase staining of iPSCs and ESCs. **C**, The iPSCs express SSEA1. **D**, The iPSCs express pluripotency genes similar to ESCs. **E**, iPSCs have a normal karyotype. **F**, iPSCs form teratomas containing all three embryonic germ layers in SCID mice. **G**, iPSCs contribute to chimeric mice.

## p18 inhibits reprogramming through inactivation of Cdk4/6

Shaohua Zhu<sup>1,2</sup>, Jiani Cao<sup>2</sup>, Hongyan Sun<sup>2,3</sup>, Kun Liu<sup>2,3</sup>, Yaqiong Li<sup>2,3</sup>, Tongbiao Zhao<sup>1,2,3\*</sup>

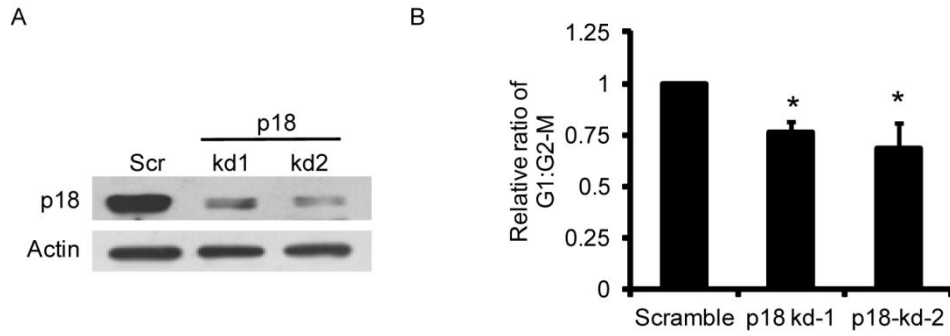

**Supplementary Figure 3 Knock down of p18 enhance reprogramming.** **A**, Western blot analysis of whole cell extracts from MEFs transfected with scramble or p18-specific shRNAs. Actin serves as a loading control. **B**, p18 knockdown significantly decreases the proportion of cells in G1 phase. Data are normalized to cells transfected with scramble shRNA and are shown as mean  $\pm$  SD; n=3, \* P<0.05.

## p18 inhibits reprogramming through inactivation of Cdk4/6

Shaohua Zhu<sup>1,2</sup>, Jiani Cao<sup>2</sup>, Hongyan Sun<sup>2,3</sup>, Kun Liu<sup>2,3</sup>, Yaqiong Li<sup>2,3</sup>, Tongbiao Zhao<sup>1,2,3\*</sup>

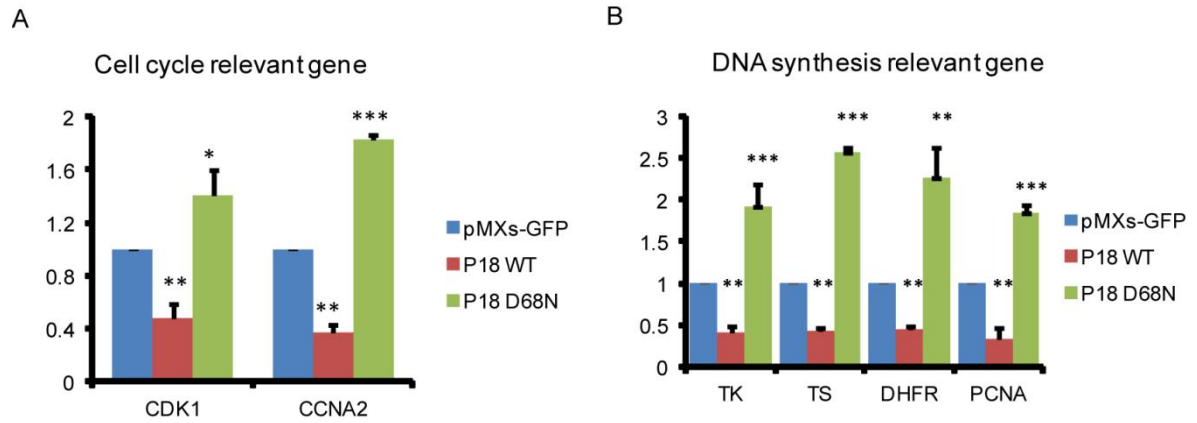

**Supplementary Figure 4 Expression of Cdk4/6 target genes is inhibited by overexpression of wild-type p18 and enhanced by overexpression of D68N mutant p18.** **A**, Expression of CDK1 and CCNA2 mRNAs in MEFs transfected with GFP, p18 or p18<sup>D68N</sup>. The results are normalized to the GFP control and presented as the mean  $\pm$  SD of three independent experiments; \*  $P < 0.05$ , \*\*  $P < 0.01$ , \*\*\*  $P < 0.001$ . **B**, Expression of TK, TS, DHFR and PCNA mRNAs in MEFs transfected with GFP, p18 or p18<sup>D68N</sup>. The results are normalized to the GFP control and presented as the mean  $\pm$  SD of three independent experiments; \*\*  $P < 0.01$ , \*\*\*  $P < 0.001$ .

**p18 inhibits reprogramming through inactivation of Cdk4/6**

Shaohua Zhu<sup>1,2</sup>, Jiani Cao<sup>2</sup>, Hongyan Sun<sup>2,3</sup>, Kun Liu<sup>2,3</sup>, Yaqiong Li<sup>2,3</sup>, Tongbiao Zhao<sup>1,2,3\*</sup>

**Supplementary Table 1**

| <b>shRNA target sequence</b>                                                       |                     |                         |
|------------------------------------------------------------------------------------|---------------------|-------------------------|
|                                                                                    | Sequences (5' →3' ) |                         |
| p18-sh1                                                                            | Forward             | GCTGCAGGTTATGAAACTTGG   |
|                                                                                    | Reverse             | CCAAGTTTCATAACCTGCAGC   |
| P18-sh2                                                                            | Forward             | GCCGACCTTACTAGTATTTAC   |
|                                                                                    | Reverse             | GTAATACTAGTAAGGTCGGC    |
| Cdk4                                                                               | Forward             | GGCCTTTGAACATCCCAATGT   |
|                                                                                    | Reverse             | ACATTGGGATGTTCAAAGGCC   |
| Cdk6                                                                               | Forward             | GGATATGATGTTTCAGCTTCT   |
|                                                                                    | Reverse             | AGAAGCTGAAACATCATATCC   |
| <b>Primers for mouse genes relevant to cell cycle regulation and DNA synthesis</b> |                     |                         |
|                                                                                    | Sequences (5'→3')   |                         |
| Actin                                                                              | Forward             | TGCTAGGAGCCAGAGCAGTA    |
|                                                                                    | Reverse             | AGTGTGACGTTGACATCCGT    |
| p18                                                                                | Forward             | GGGGACCTAGAGCAACTTACT   |
|                                                                                    | Reverse             | AAATTGGGATTAGCACCTCTGAG |
| Ccna1                                                                              | Forward             | ACCGTGCTAGGGGTGTTGA     |
|                                                                                    | Reverse             | CGTTTGGCTGGTTCATTGACC   |
| Cdk1                                                                               | Forward             | AGGTACTTACGGTGTGGTGTAT  |
|                                                                                    | Reverse             | CTCGCTTTCAAGTCTGATCTTCT |
| PCNA                                                                               | Forward             | TTGCACGTATATGCCGAGACC   |
|                                                                                    | Reverse             | GGTGAACAGGCTCATTCTCTCT  |
| DHFR                                                                               | Forward             | CGCTCAGGAACGAGTTCAAGT   |
|                                                                                    | Reverse             | TGCCAATTCGGTTGTTCAATAA  |
| TS                                                                                 | Forward             | GGAAGGGTGTTTTGGAGGAGT   |
|                                                                                    | Reverse             | GCTGTCCAGAAAATCTCGGGA   |
| TK1                                                                                | Forward             | AGTGCCTGGTCATCAAGTATGC  |
|                                                                                    | Reverse             | GCTGCCACAATTACTGTCTTGC  |
| Cdk6                                                                               | Forward             | TCTCACAGAGTAGTGCATCGT   |
|                                                                                    | Reverse             | CGAGGTAAGGGCCATCTGAAAA  |
| Cdk4                                                                               | Forward             | AAGGTCACCCTAGTGTGAGC    |
|                                                                                    | Reverse             | CCGCTTAGAAACTGACGCATTAG |

## p18 inhibits reprogramming through inactivation of Cdk4/6

Shaohua Zhu<sup>1,2</sup>, Jiani Cao<sup>2</sup>, Hongyan Sun<sup>2,3</sup>, Kun Liu<sup>2,3</sup>,  
Yaqiong Li<sup>2,3</sup>, Tongbiao Zhao<sup>1,2,3\*</sup>

### Supplementary Table 2

GPL1261 Title [Mouse430\_2] Affymetrix Mouse Genome 430 2.0 Array

| sample                                       | GSE      | GSM        |
|----------------------------------------------|----------|------------|
| ES.B6xD2F1.rep1                              | GSE21515 | GSM537476  |
| ES.B6xD2F1.rep2                              | GSE21515 | GSM537477  |
| ES.B6xD2F1.rep3                              | GSE21515 | GSM537478  |
| v6.5.ES.cells.1                              | GSE14012 | GSM344757  |
| v6.5.ES.cells.2                              | GSE14012 | GSM344758  |
| E14.ES.cells.1                               | GSE14012 | GSM344759  |
| E14.ES.cells.2                               | GSE14012 | GSM344760  |
| ES..OG2.Rosa26..1                            | GSE10806 | GSM272753  |
| ES..OG2.Rosa26..2                            | GSE10806 | GSM272836  |
| ES..OG2.Rosa26..3                            | GSE10806 | GSM272837  |
| es.CGR8.129sv                                | GSE15267 | gsm381701  |
| eslineR1.129sv                               | GSE15267 | gsm381704  |
| ESC.Open.Biosystems.C57Bl6                   | GSE44923 | GSM1093945 |
| ESC_Primogenix.C57Bl6                        | GSE44923 | GSM1093946 |
| ES.C57.BlxBlackSwiss.1                       | GSE32598 | GSM808020  |
| ES.C57.BlxBlackSwiss.2                       | GSE32598 | GSM808021  |
| ES.C57.BlxBlackSwiss.3                       | GSE32598 | GSM808022  |
| EB3_ESC                                      | GSE31725 | GSM784988  |
| CL11.ES.B6D2F1.1                             | GSE16925 | GSM424475  |
| CL11.ES.B6D2F1.2                             | GSE16925 | GSM424476  |
| CL11.ES.B6D2F1.3                             | GSE16925 | GSM424477  |
| ESC.129sv.Jae.1                              | GSE24705 | GSM638103  |
| ESC.129sv.Jae.2                              | GSE24705 | GSM638104  |
| ESC.129sv.Jae.3                              | GSE24705 | GSM638105  |
| MEFs.male.1                                  | GSE14012 | gsm344765  |
| MEFs.male.2                                  | GSE14012 | gsm344766  |
| MEFs.female.1                                | GSE14012 | gsm344767  |
| MEFs.female.2                                | GSE14012 | gsm344768  |
| Tail.tip.fibroblasts                         | GSE32598 | GSM808023  |
| Adult.skin.fibroblast                        | GSE31725 | GSM784982  |
| MEF.B6D2F1.rep1                              | GSE16925 | GSM424478  |
| MEF.B6D2F1.rep2                              | GSE16925 | GSM424479  |
| MEF.B6D2F1.rep3                              | GSE16925 | GSM424480  |
| MEF.serum.free.OG2.Rosa26                    | GSE15267 | GSM381302  |
| MEF.serum.free.OG2.Rosa26.1                  | GSE15267 | GSM381303  |
| uninduced.MEFs.                              | GSE14012 | gsm344756  |
| MEFs.male.1.1                                | GSE14012 | gsm344765  |
| MEFs.male.2.1                                | GSE14012 | gsm344766  |
| MEFs.female.1.1                              | GSE14012 | gsm344767  |
| MEFs.female.2.1                              | GSE14012 | gsm344768  |
| X4F.serumfree.iPS.cell.line.S2C12.OG2.Rosa26 | GSE15267 | GSM381305  |
| X4F.serumfree.iPS.cell.line.S2C16.OG2.Rosa26 | GSE15267 | GSM381306  |
| X3F.serumfree.iPS.cell.line.S53C1.OG2.Rosa26 | GSE15267 | GSM381307  |
| X3F.serumfree.iPS.cell.line.S53C5.OG2.Rosa26 | GSE15267 | GSM381308  |

|                     |          |           |
|---------------------|----------|-----------|
| IP20D.3.B6D2F1.1    | GSE16925 | GSM424487 |
| IP20D.3.B6D2F1.2    | GSE16925 | GSM424488 |
| IP20D.3.B6D2F1.3    | GSE16925 | GSM424489 |
| X38C2_iPSC          | GSE31725 | GSM784983 |
| TTF.derived.iPSCs.1 | GSE32598 | GSM808017 |
| TTF.derived.iPSCs.2 | GSE32598 | GSM808018 |
| TTF.derived.iPSCs.3 | GSE32598 | GSM808019 |
| IP36D.3.B6xD2.F1.1  | GSE21515 | GSM537488 |
| IP36D.3.B6xD2.F1.2  | GSE21515 | GSM537489 |
| IP36D.3.B6xD2.F1.3  | GSE21515 | GSM537490 |
